# Supplementary material for: Post Hartree–Fock calculations of pnictogen–uranium bonding in EUF3 (E = N–Bi)
Source: Royal Society of Chemistry journal article supplement (doi:10.1039/c8cc05581e), 2018-01-01
Supplement: c8cc05581e1.pdf [file c8cc05581e1.pdf]

# Supplementary information

## Computational Methodology

The def2-TZPP basis set<sup>1</sup> (obtained from the EMSL Basis Set Exchange<sup>2,3</sup>) was used for all elements except uranium. The def2-TZPP basis set is all electron for F, N, P and As; for Sb, a 28 electron effective core potential (ECP) is used and for Bi a 60 electron ECP. For uranium, the 60-electron quasi-relativistic ECP of the Stuttgart/Cologne Group was used along with the associated atomic natural orbital basis set.<sup>4,5,6</sup> Calculations were performed with Molpro version 2015.1,<sup>7</sup> using the CASSCF program 'Multi',<sup>8,9</sup> and the second-order multiconfigurational perturbation theory program 'rs2c'.<sup>10</sup>

Geometry optimisations at the CASSCF level of theory were performed for all molecules NUF<sub>3</sub>-BiUF<sub>3</sub>; geometry optimisations at the CASPT2 level of theory were performed for NUF<sub>3</sub>, PUF<sub>3</sub> and AsUF<sub>3</sub>. Geometry optimisations were first performed in C<sub>s</sub> symmetry, but the optimised geometry of NUF<sub>3</sub> was approximately C<sub>3v</sub>, and was re-optimised in that point group. CASPT2 geometry optimisations and harmonic frequency calculations were numerical, due to the lack of analytical gradients in the rs2c program. A level shift of 0.1 was applied for NUF<sub>3</sub>, and 0.3 for PUF<sub>3</sub> and AsUF<sub>3</sub> (unless otherwise noted in the SI). Wavefunctions were calculated in C<sub>s</sub> symmetry (regardless of the point group of the geometry optimisation) with both space-symmetric and antisymmetric wavefunctions optimised at the singlet, triplet and quintet multiplicities--the effects of spin-orbit coupling were not taken into account.

Quantum Theory of Atoms-in-Molecules (QTAIM)<sup>11</sup> analyses were performed with AIMALL,<sup>12</sup> using .wfx files generated by the Molden2AIM program.<sup>13</sup>

Calculated states of EUF<sub>3</sub> at CASSCF (E = N...Bi) and CASPT2 (E = N, P, As) levels of theory. A [6,16] active space is used in all cases. All states are geometrically optimised. Electronic energy relative to the global minimum, electronic energy, natural orbital occupancies, effective bond orders and E-U bond lengths (in ångstrom) given.

## Electronic States

Table S1:  $\text{NUF}_3$  CASSCF/def2-TZVPP (N, F), SDD (U), optimised geometry

|         | $\Delta E_{el} / eV$ | $E_{el} / Ha$ | $\sigma$ | $\pi$ | $\pi^*$ | $\sigma^*$ | $f(n.b)$ | $BO_{eff}$ | $r(N-U) / \text{\AA}$ |
|---------|----------------------|---------------|----------|-------|---------|------------|----------|------------|-----------------------|
| $^1A'$  | 0.000                | -828.483      | 1.901    | 3.805 | 0.166   | 0.087      | 0.000    | 2.727      | 1.750                 |
| $^3A''$ | 1.903                | -828.413      | 0.970    | 3.774 | 0.194   | 0.029      | 0.999    | 2.260      | 1.926                 |
| $^1A''$ | 1.953                | -828.411      | 0.976    | 3.717 | 0.251   | 0.020      | 1.000    | 2.211      | 1.962                 |
| $^3A'$  | 2.035                | -828.408      | 1.863    | 2.849 | 0.134   | 0.123      | 0.993    | 2.227      | 1.984                 |
| $^5A'$  | 2.128                | -828.405      | 1.959    | 1.982 | 0.000   | 0.026      | 1.998    | 1.957      | 2.327                 |
| $^5A''$ | 2.576                | -828.388      | 0.991    | 2.943 | 0.289   | 0.000      | 1.714    | 1.822      | 2.221                 |

Table S2:  $\text{NUF}_3$  CASPT2/def2-TZVPP (N, F), SDD (U), optimised geometry, level shift = 0.1

|           | $\Delta E_{el} / eV$ | $E_{el} / Ha$ | $\sigma$ | $\pi$ | $\pi^*$ | $\sigma^*$ | $f(n.b)$ | $BO_{eff}$ | $r(N-U) / \text{\AA}$ |
|-----------|----------------------|---------------|----------|-------|---------|------------|----------|------------|-----------------------|
| $^1A'$    | 0.000                | -829.754      | 1.903    | 3.809 | 0.161   | 0.086      | 0.000    | 2.733      | 1.753                 |
| $^3A''^*$ | 1.602                | -829.695      | 0.970    | 3.800 | 0.160   | 0.030      | 1.000    | 2.290      | 1.886                 |
| $^3A'$    | 1.987                | -829.681      | 1.872    | 1.862 | 1.111   | 0.124      | 0.992    | 1.249      | 1.990                 |
| $^1A''^o$ | 2.087                | -829.678      | 0.976    | 3.752 | 0.216   | 0.022      | 0.998    | 2.245      | 1.926                 |
| $^5A''^*$ | 2.598                | -829.659      | 1.960    | 1.985 | 0.302   | 0.017      | 1.699    | 1.813      | 2.286                 |
| $^5A'^*$  | 2.614                | -829.658      | 1.960    | 1.985 | 1.564   | 0.017      | 0.437    | 1.182      | 2.278                 |

\*level shift = 0.2  $^o$ level shift = 0.5

Table S3:  $\text{PUF}_3$  CASSCF/def2-TZVPP (P, F), SDD (U), optimised geometry

|         | $\Delta E_{el} / eV$ | $E_{el} / Ha$ | $\sigma$ | $\pi$ | $\pi^*$ | $\sigma^*$ | $f(n.b)$ | $BO_{eff}$ | $r(P-U) / \text{\AA}$ |
|---------|----------------------|---------------|----------|-------|---------|------------|----------|------------|-----------------------|
| $^1A'$  | 0.000                | -1114.714     | 1.932    | 2.198 | 1.533   | 0.017      | 0.253    | 1.290      | 2.855                 |
| $^5A''$ | 0.014                | -1114.714     | 1.931    | 1.982 | 1.347   | 0.018      | 0.653    | 1.274      | 2.883                 |
| $^3A'$  | 0.024                | -1114.713     | 1.932    | 2.031 | 1.492   | 0.017      | 0.460    | 1.226      | 2.879                 |
| $^1A''$ | 0.100                | -1114.710     | 1.931    | 1.173 | 1.808   | 0.017      | 1.000    | 0.639      | 2.873                 |
| $^3A''$ | 0.166                | -1114.708     | 1.940    | 2.008 | 0.971   | 0.021      | 1.000    | 1.478      | 2.860                 |
| $^5A'$  | 0.184                | -1114.707     | 1.942    | 1.979 | 1.533   | 0.018      | 0.467    | 1.184      | 2.865                 |

Table S4: **PUF<sub>3</sub> CASPT2/def2-TZVPP** (P, F), SDD (U), optimised geometry, level shift = 0.3

|         | $\Delta E_{el} / eV$ | $E_{el} / Ha$ | $\sigma$ | $\pi$ | $\pi^*$ | $\sigma^*$ | $f(n.b)$ | $BO_{eff}$ | $r(P-U) / \text{\AA}$ |
|---------|----------------------|---------------|----------|-------|---------|------------|----------|------------|-----------------------|
| $^1A'$  | 0.000                | -1115.949     | 1.931    | 2.141 | 1.333   | 0.0167     | 0.510    | 1.362      | 2.743                 |
| $^3A''$ | 0.031                | -1115.948     | 1.931    | 2.012 | 0.971   | 0.0171     | 1.000    | 1.478      | 2.770                 |
| $^3A'$  | 0.034                | -1115.948     | 1.931    | 2.025 | 0.961   | 0.0072     | 0.998    | 1.494      | 2.771                 |
| $^5A''$ | 0.063                | -1115.947     | 1.931    | 1.982 | 0.312   | 0.0177     | 1.688    | 1.792      | 2.800                 |
| $^5A'$  | 0.068                | -1115.947     | 1.931    | 1.982 | 0.784   | 0.0177     | 1.216    | 1.556      | 2.796                 |
| $^1A''$ | 0.229                | -1115.941     | 1.931    | 2.193 | 0.788   | 0.017      | 1.000    | 1.659      | 2.771                 |

Table S5: **AsUF<sub>3</sub> CASSCF/def2-TZVPP** (As, F), SDD (U), optimised geometry

|         | $\Delta E_{el} / eV$ | $E_{el} / Ha$ | $\sigma$ | $\pi$ | $\pi^*$ | $\sigma^*$ | $f(n.b)$ | $BO_{eff}$ | $r(As-U) / \text{\AA}$ |
|---------|----------------------|---------------|----------|-------|---------|------------|----------|------------|------------------------|
| $^5A''$ | 0.000                | -3008.183     | 1.943    | 1.985 | 0.327   | 0.015      | 1.673    | 1.793      | 2.999                  |
| $^5A'$  | 0.002                | -3008.183     | 1.943    | 1.985 | 0.505   | 0.015      | 1.496    | 1.704      | 2.996                  |
| $^3A'$  | 0.007                | -3008.183     | 1.943    | 2.014 | 1.440   | 0.015      | 0.532    | 1.251      | 2.996                  |
| $^3A''$ | 0.014                | -3008.182     | 1.943    | 2.000 | 0.986   | 0.015      | 1.000    | 1.471      | 3.001                  |
| $^1A'$  | 0.080                | -3008.180     | 1.943    | 2.305 | 1.674   | 0.023      | 0.000    | 1.275      | 2.951                  |
| $^1A''$ | 0.296                | -3008.172     | 1.946    | 1.129 | 0.861   | 0.021      | 1.990    | 1.096      | 2.973                  |

Table S6: **AsUF<sub>3</sub> CASPT2/def2-TZVPP** (As, F), SDD (U), optimised geometry, level shift = 0.3

|           | $\Delta E_{el} / eV$ | $E_{el} / Ha$ | $\sigma$ | $\pi$ | $\pi^*$ | $\sigma^*$ | $f(n.b)$ | $BO_{eff}$ | $r(As-U) / \text{\AA}$ |
|-----------|----------------------|---------------|----------|-------|---------|------------|----------|------------|------------------------|
| $^1A'$    | 0.000                | -3009.364     | 1.943    | 2.085 | 1.334   | 0.014      | 0.567    | 1.340      | 2.871                  |
| $^3A''$   | 0.022                | -3009.363     | 1.943    | 2.009 | 0.977   | 0.014      | 1.000    | 1.480      | 2.893                  |
| $^3A'$    | 0.039                | -3009.362     | 1.943    | 2.020 | 1.310   | 0.010      | 0.655    | 1.321      | 2.901                  |
| $^5A''$   | 0.042                | -3009.362     | 1.943    | 1.985 | 0.315   | 0.015      | 1.686    | 1.799      | 2.910                  |
| $^5A'$    | 0.053                | -3009.362     | 1.943    | 1.985 | 0.503   | 0.010      | 1.498    | 1.708      | 2.905                  |
| $^1A''^*$ | 0.306                | -3009.353     | 1.943    | 2.028 | 0.958   | 0.014      | 1.000    | 1.500      | 2.890                  |

\*level shift = 0.5

Table S7: **SbUF<sub>3</sub>** CASSCF/def2-TZVPP (Sb, F), SDD (U), optimised geometry

|         | $\Delta E_{el} / eV$ | $E_{el} / Ha$ | $\sigma$ | $\pi$ | $\pi^*$ | $\sigma^*$ | $f(n.b)$ | $BO_{eff}$ | $r(Sb-U) / \text{\AA}$ |
|---------|----------------------|---------------|----------|-------|---------|------------|----------|------------|------------------------|
| $^5A''$ | 0.000                | -1013.252     | 1.943    | 1.985 | 1.000   | 0.016      | 1.000    | 1.456      | 3.220                  |
| $^5A'$  | 0.001                | -1013.252     | 1.943    | 1.985 | 1.000   | 0.016      | 1.000    | 1.456      | 3.219                  |
| $^1A'$  | 0.008                | -1013.251     | 1.943    | 2.131 | 1.608   | 0.015      | 0.246    | 1.225      | 3.208                  |
| $^3A'$  | 0.010                | -1013.251     | 1.943    | 2.004 | 1.702   | 0.015      | 0.279    | 1.115      | 3.221                  |
| $^3A''$ | 0.014                | -1013.251     | 1.943    | 1.995 | 1.000   | 0.015      | 0.990    | 1.462      | 3.225                  |
| $^1A''$ | 0.096                | -1013.248     | 1.942    | 2.128 | 0.855   | 0.016      | 1.000    | 1.600      | 3.220                  |

Table S8: **BiUF<sub>3</sub>** CASSCF/def2-TZVPP (As, F), SDD (U), optimised geometry

|         | $\Delta E_{el} / eV$ | $E_{el} / Ha$ | $\sigma$ | $\pi$ | $\pi^*$ | $\sigma^*$ | $f(n.b)$ | $BO_{eff}$ | $r(Bi-U) / \text{\AA}$ |
|---------|----------------------|---------------|----------|-------|---------|------------|----------|------------|------------------------|
| $^1A'$  | 0.000                | -987.556      | 1.937    | 2.164 | 1.574   | 0.030      | 0.242    | 1.248      | 3.277                  |
| $^1A''$ | 0.023                | -987.555      | 1.938    | 2.009 | 1.232   | 0.029      | 0.740    | 1.343      | 3.282                  |
| $^3A'$  | 0.027                | -987.555      | 1.939    | 2.012 | 1.479   | 0.027      | 0.489    | 1.223      | 3.261                  |
| $^3A''$ | 0.033                | -987.554      | 1.939    | 1.995 | 1.255   | 0.027      | 0.730    | 1.326      | 3.282                  |
| $^5A''$ | 0.041                | -987.554      | 1.943    | 1.979 | 1.372   | 0.023      | 0.628    | 1.263      | 3.276                  |
| $^5A'$  | 0.042                | -987.554      | 1.943    | 1.979 | 1.507   | 0.024      | 0.493    | 1.196      | 3.274                  |

## Frequency Calculations ([6,16] CASPT2)

Table S9: Frequency calculations at the CASPT2 level of theory. Frequency calculations are numerical, and performed without wavefunction symmetry. Frequencies given in  $\text{cm}^{-1}$ 

|               | $U-E$<br><i>stretch</i><br>$a_1/a'$ | $U-F$<br><i>stretch</i><br>$a_1/a'$ | $U-F$<br><i>stretch</i><br>$e/a'$ | $U-F$<br><i>stretch</i><br>$e/a''$ | $U-F$<br><i>bend</i><br>$a_1/a'$ | $U-F$<br><i>bend</i><br>$e/a'$ | $U-F$<br><i>bend</i><br>$e/a''$ | $E-U-F$<br><i>bend</i><br>$e/a'$ | $E-U-F$<br><i>bend</i><br>$e/a''$ | #imag.<br>freq. |
|---------------|-------------------------------------|-------------------------------------|-----------------------------------|------------------------------------|----------------------------------|--------------------------------|---------------------------------|----------------------------------|-----------------------------------|-----------------|
| $NUF_3 ^1A_1$ | 928.44                              | 630.44                              | 546.75                            | 546.18                             | 144.48                           | 138.88                         | 138.80                          | 9.52i                            | 0.73i                             | 2               |
| $PUF_3 ^1A'$  | 260.22                              | 591.61                              | 544.10                            | 530.44                             | 107.69                           | 5.53                           | 100.00                          | 50.09i                           | 46.08i                            | 2               |
| $AsUF_3 ^1A'$ | 193.65                              | 594.34                              | 546.79                            | 528.13                             | 107.85                           | 32.62i                         | 91.73                           | 84.11i                           | 69.44i                            | 3               |

## Optimised Geometries

Z matrix variables of the optimised geometries are given in ångstrom for bond lengths and degrees for angles. Z-matrix all of the form:

U,  
E, U, B1,  
F1, U, B2, E, A1,  
F2, U, B3, E, A2, F1, D1, 0,  
F3, U, B3, E, A2, F1, -D1, 0,

Table S10: NUF<sub>3</sub> CASSCF [6,16] optimised geometries

|               | <sup>1</sup> A' | <sup>1</sup> A'' | <sup>3</sup> A' | <sup>3</sup> A'' | <sup>5</sup> A' | <sup>5</sup> A'' |
|---------------|-----------------|------------------|-----------------|------------------|-----------------|------------------|
| <i>B1</i> / Å | 1.74966363      | 1.96207590       | 1.98376709      | 1.92583599       | 2.32732023      | 2.22068830       |
| <i>B2</i> / Å | 2.06247224      | 2.07064231       | 2.06034721      | 2.06169677       | 2.06327373      | 2.06528070       |
| <i>B3</i> / Å | 119.26670015    | 117.53550905     | 119.97127633    | 123.22698633     | 113.12592329    | 105.03934627     |
| <i>A1</i> / ° | 2.06248584      | 2.07057741       | 2.07937513      | 2.07464437       | 2.06518285      | 2.06760061       |
| <i>A2</i> / ° | 119.31825159    | 117.68409939     | 109.11952786    | 114.19898228     | 104.62218407    | 111.79501377     |
| <i>D1</i> / ° | 119.98346235    | 119.99151795     | 115.59685227    | 120.33368540     | 117.22853506    | 120.44948587     |

Table S11: NUF<sub>3</sub> CASPT2 [6,16] optimised geometries

|               | <sup>1</sup> A' | <sup>1</sup> A'' | <sup>3</sup> A' | <sup>3</sup> A'' | <sup>5</sup> A' | <sup>5</sup> A'' |
|---------------|-----------------|------------------|-----------------|------------------|-----------------|------------------|
| <i>B1</i> / Å | 1.75315792      | 1.92604004       | 1.99004607      | 1.88435033       | 2.27835083      | 2.28650344       |
| <i>B2</i> / Å | 2.04485854      | 2.05302879       | 2.04665842      | 2.03788217       | 2.05331815      | 2.05374786       |
| <i>B3</i> / Å | 2.04485854      | 2.04921027       | 2.06635945      | 2.06054510       | 2.05942704      | 2.05624541       |
| <i>A1</i> / ° | 122.58314996    | 99.04872772      | 121.25316610    | 141.90245469     | 103.52253600    | 109.92919824     |
| <i>A2</i> / ° | 122.58314996    | 127.45327165     | 107.87668701    | 107.35099811     | 106.45590828    | 104.58243365     |
| <i>D1</i> / ° | 119.97200364    | 113.23606871     | 114.30883104    | 124.78557197     | 116.13020533    | 122.95979828     |

Table S12: PUF<sub>3</sub> CASSCF [6,16] optimised geometries

|               | <sup>1</sup> A' | <sup>1</sup> A'' | <sup>3</sup> A' | <sup>3</sup> A'' | <sup>5</sup> A' | <sup>5</sup> A'' |
|---------------|-----------------|------------------|-----------------|------------------|-----------------|------------------|
| <i>B1</i> / Å | 2.85487233      | 2.87307254       | 2.87898686      | 2.86018471       | 2.86483680      | 2.88262101       |
| <i>B2</i> / Å | 2.06330151      | 2.06754338       | 2.05713816      | 2.05488434       | 2.05870044      | 2.05577362       |
| <i>B3</i> / Å | 2.06329881      | 2.05661772       | 2.06312145      | 2.06274954       | 2.06042015      | 2.06202954       |
| <i>A1</i> / ° | 108.08441646    | 106.12601358     | 108.25828906    | 107.67882184     | 107.50633008    | 109.81992138     |
| <i>A2</i> / ° | 108.07221905    | 109.18338207     | 107.83836643    | 108.02790589     | 107.50986207    | 107.03349551     |
| <i>D1</i> / ° | 119.98188899    | 119.91887086     | 122.26806489    | 122.39787190     | 116.46055934    | 122.65750282     |

Table S13: PUF<sub>3</sub> CASPT2 [6,16] optimised geometries

|               | <sup>1</sup> A' | <sup>1</sup> A'' | <sup>3</sup> A' | <sup>3</sup> A'' | <sup>5</sup> A' | <sup>5</sup> A'' |
|---------------|-----------------|------------------|-----------------|------------------|-----------------|------------------|
| <i>B1</i> / Å | 2.74344624      | 2.77127150       | 2.78567990      | 2.76986521       | 2.79582952      | 2.79991948       |
| <i>B2</i> / Å | 2.04944358      | 2.05392432       | 2.04084123      | 2.04419397       | 2.04532166      | 2.04437239       |
| <i>B3</i> / Å | 2.05246669      | 2.04555281       | 2.05383880      | 2.05142110       | 2.05020489      | 2.04899668       |
| <i>A1</i> / ° | 105.10446315    | 103.45650116     | 105.79445974    | 105.19041589     | 108.15012735    | 109.83601344     |
| <i>A2</i> / ° | 104.97744266    | 109.10153060     | 104.84078912    | 106.76007393     | 105.47665484    | 105.47531864     |
| <i>D1</i> / ° | 111.74179511    | 119.29915794     | 125.39655946    | 123.15852805     | 123.49864932    | 123.22404395     |

Table S14: **PUF<sub>3</sub> CASPT2 [6,6]** optimised geometry

|        | <sup>1</sup> A' |
|--------|-----------------|
| B1 / Å | 2.44583209      |
| B2 / Å | 2.03441332      |
| B3 / Å | 2.03441332      |
| A1 / ° | 120.58416314    |
| A2 / ° | 120.58416314    |
| D1 / ° | 120.00000000    |

Table S15: **AsUF<sub>3</sub> CASSCF [6,16]** optimised geometries

|        | <sup>1</sup> A' | <sup>1</sup> A'' | <sup>3</sup> A' | <sup>3</sup> A'' | <sup>5</sup> A' | <sup>5</sup> A'' |
|--------|-----------------|------------------|-----------------|------------------|-----------------|------------------|
| B1 / Å | 2.95095386      | 2.97344563       | 2.99638316      | 3.00106915       | 2.99639075      | 2.99898403       |
| B2 / Å | 2.05856220      | 2.05443031       | 2.05806991      | 2.05269929       | 2.05760834      | 2.05360612       |
| B3 / Å | 2.05858915      | 2.06531671       | 2.05900099      | 2.06069238       | 2.05928422      | 2.05996764       |
| A1 / ° | 109.10003689    | 108.87121501     | 109.31699988    | 108.62761259     | 108.18297141    | 110.03184374     |
| A2 / ° | 109.07630568    | 108.75416391     | 107.07313858    | 107.88872382     | 107.19792721    | 107.34404512     |
| D1 / ° | 119.96581826    | 123.88872103     | 115.85400273    | 122.63188038     | 115.93625359    | 122.65071001     |

Table S16: **AsUF<sub>3</sub> CASPT2 [6,16]** optimised geometries

|        | <sup>1</sup> A' | <sup>1</sup> A'' | <sup>3</sup> A' | <sup>3</sup> A'' | <sup>5</sup> A' | <sup>5</sup> A'' |
|--------|-----------------|------------------|-----------------|------------------|-----------------|------------------|
| B1 / Å | 2.87103834      | 2.89019864       | 2.90714091      | 2.89300332       | 2.90458440      | 2.91016953       |
| B2 / Å | 2.04893379      | 2.04300197       | 2.04081681      | 2.04339804       | 2.04624629      | 2.04341232       |
| B3 / Å | 2.05169932      | 2.04990351       | 2.04656500      | 2.05069225       | 2.05130089      | 2.04884815       |
| A1 / ° | 105.31355176    | 105.26257931     | 110.27643340    | 105.97650475     | 104.97318200    | 110.04834229     |
| A2 / ° | 105.38649558    | 107.04913704     | 105.18514065    | 106.70908361     | 105.91751855    | 105.64739257     |
| D1 / ° | 112.10479959    | 123.07590962     | 115.08441516    | 123.29710737     | 113.39243801    | 123.29995138     |

Table S17: **SbUF<sub>3</sub> CASSCF [6,16]** optimised geometries

|        | <sup>1</sup> A' | <sup>1</sup> A'' | <sup>3</sup> A' | <sup>3</sup> A'' | <sup>5</sup> A' | <sup>5</sup> A'' |
|--------|-----------------|------------------|-----------------|------------------|-----------------|------------------|
| B1 / Å | 3.20816964      | 3.21966056       | 3.22119937      | 3.22533659       | 3.21908393      | 3.22033463       |
| B2 / Å | 2.05773287      | 2.06274178       | 2.05507969      | 2.04979538       | 2.05488595      | 2.05060653       |
| B3 / Å | 2.05767308      | 2.05136075       | 2.05627145      | 2.05782646       | 2.05661818      | 2.05747406       |
| A1 / ° | 108.63503163    | 107.45328614     | 109.48034612    | 109.06850427     | 108.55017177    | 110.18561632     |
| A2 / ° | 108.58549558    | 109.17680721     | 107.38137318    | 108.19846413     | 107.59897703    | 107.78332464     |
| D1 / ° | 120.05135064    | 120.23443643     | 115.69668696    | 122.61913254     | 115.82500088    | 122.64493084     |

Table S18: BiUF<sub>3</sub> CASSCF [6,16] optimised geometries

|        | <sup>1</sup> A' | <sup>1</sup> A'' | <sup>3</sup> A' | <sup>3</sup> A'' | <sup>5</sup> A' | <sup>5</sup> A'' |
|--------|-----------------|------------------|-----------------|------------------|-----------------|------------------|
| B1 / Å | 3.26067651      | 3.28187390       | 3.27730259      | 3.28142156       | 3.27416886      | 3.27630339       |
| B2 / Å | 2.06026239      | 2.05271034       | 2.05774247      | 2.05213107       | 2.05670185      | 2.05249744       |
| B3 / Å | 2.06024022      | 2.06002321       | 2.05815706      | 2.05994190       | 2.05826193      | 2.05909817       |
| A1 / ° | 108.50661518    | 107.76367729     | 109.23817717    | 108.46948235     | 108.10335375    | 110.11807776     |
| A2 / ° | 108.44222008    | 108.33175721     | 107.51542263    | 108.19084219     | 107.87322869    | 107.84112289     |
| D1 / ° | 120.01642730    | 122.32915801     | 116.58485815    | 122.44965955     | 116.19337716    | 122.55055062     |

Table S19: PUF<sub>3</sub> SA-CASSCF [6,16] pseudo-natural orbital occupancies for each state, electronic energies and relative energies. All states <sup>1</sup>A' symmetry, performed at the CASPT2 optimised geometry.

| State | A'   |      |      |                 |                 |                 |                 |                 |                 |                 | A''  |      |      |                 |                 |                 | 5f <sub>U</sub> + π* | Eel / Ha  | ΔE / eV |
|-------|------|------|------|-----------------|-----------------|-----------------|-----------------|-----------------|-----------------|-----------------|------|------|------|-----------------|-----------------|-----------------|----------------------|-----------|---------|
|       | σ    | π    | π*   | 5f <sub>U</sub> | 5f <sub>U</sub> | 5f <sub>U</sub> | 3d <sub>P</sub> | 3d <sub>P</sub> | 3d <sub>P</sub> | 3d <sub>P</sub> | π    | f    | π*   | 5f <sub>U</sub> | 3d <sub>P</sub> | 3d <sub>P</sub> |                      |           |         |
| 1     | 1.93 | 1.03 | 0.55 | 0.40            | 0.01            | 0.00            | 0.02            | 0.02            | 0.01            | 0.00            | 1.03 | 0.51 | 0.44 | 0.02            | 0.01            | 0.01            | 1.92                 | -1114.701 | 0.00    |
| 2     | 1.93 | 1.02 | 0.45 | 0.51            | 0.01            | 0.00            | 0.02            | 0.02            | 0.01            | 0.00            | 1.01 | 0.54 | 0.41 | 0.02            | 0.01            | 0.01            | 1.95                 | -1114.701 | 0.01    |
| 3     | 1.93 | 0.99 | 0.21 | 0.34            | 0.31            | 0.14            | 0.02            | 0.02            | 0.01            | 0.00            | 1.02 | 0.41 | 0.53 | 0.04            | 0.01            | 0.01            | 1.98                 | -1114.694 | 0.19    |
| 4     | 1.93 | 1.03 | 0.22 | 0.44            | 0.10            | 0.19            | 0.02            | 0.02            | 0.01            | 0.00            | 1.02 | 0.13 | 0.38 | 0.46            | 0.01            | 0.01            | 1.93                 | -1114.689 | 0.33    |
| 5     | 1.93 | 1.02 | 0.44 | 0.04            | 0.44            | 0.05            | 0.02            | 0.02            | 0.01            | 0.00            | 1.02 | 0.19 | 0.31 | 0.47            | 0.01            | 0.01            | 1.95                 | -1114.687 | 0.40    |
| 6     | 1.93 | 0.98 | 0.15 | 0.25            | 0.26            | 0.35            | 0.02            | 0.01            | 0.01            | 0.00            | 0.98 | 0.53 | 0.09 | 0.40            | 0.01            | 0.01            | 2.02                 | -1114.685 | 0.45    |

## References

- 1 F. Weigend and R. Ahlrichs, *Phys. Chem. Chem. Phys.*, 2005, **7**, 3297.
- 2 D. Feller, *J. Comput. Chem.*, 1996, **17**, 1571–1586.
- 3 K. L. Schuchardt, B. T. Didier, T. Elsethagen, L. Sun, V. Gurumoorthi, J. Chase, J. Li and T. L. Windus, *J. Chem. Inf. Model.*, 2007, **47**, 1045–1052.
- 4 X. Cao, M. Dolg and H. Stoll, *J. Chem. Phys.*, 2003, **118**, 487–496.
- 5 X. Cao and M. Dolg, *THEOCHEM*, 2004, **673**, 203–209.
- 6 W. Küchle, M. Dolg, H. Stoll and H. Preuss, *J. Chem. Phys.*, 1994, **100**, 7535–7542.
- 7 H.-J. Werner, P. J. Knowles, G. Knizia, F. R. Manby, M. Schütz *et al.*, *MOLPRO, version 2015.1*, 2015.
- 8 P. J. Knowles and H. J. Werner, *Chem. Phys. Letters*, 1985, **115**, 259–267.
- 9 H. J. Werner and P. J. Knowles, *J. Chem. Phys.*, 1985, **82**, 5053–5063.
- 10 P. Celani and H. J. Werner, *J. Chem. Phys.*, 2000, **112**, 5546–5557.
- 11 R. F. Bader, *Atoms in molecules: a quantum theory*, Clarendon Pr., 1990.
- 12 O. P. K. U. Todd A. Keith, TK Gristmill Software, *AIMAll (Version 17.11.14)*, 2017.
- 13 W. Zou, D. Nori-Shargh and J. E. Boggs, *J. Phys. Chem. A*, 2013, **117**, 207–212.
